# Supplementary material
Source: PubMed Central journal article supplement (PMC2910749)

**CHEMBIOCHEM**

## Supporting Information

© Copyright Wiley-VCH Verlag GmbH & Co. KGaA, 69451 Weinheim, 2008

# CHEM**BIO**CHEM

## Supporting Information

for

Identification of Pharmacological Chaperones for Gaucher Disease and  
Characterization of Their Effects on  $\beta$ -Glucocerebrosidase by  
Hydrogen/Deuterium Exchange Mass Spectrometry

Michael B. Tropak, Gregory J. Kornhaber, Brigitte A. Rigat, Gustavo H. Maegawa,  
Justin Buttner, Jan E. Blanchard, Cecilia Murphy, Steven J. Tuske,  
Stephen J. Coales, Yoshitomo Hamuro, Eric Brown, and Don J. Mahuran\*

**Table S1:** List of 108 primary hits that reduced Gcc Residual Activity below 30%. Shown are the Maybridge Identification Code for the compound and directly beneath, the IC<sub>50</sub> value (μM) determined in the secondary screen (columns labelled Code) and the 2D structure of the compound (columns labelled Structure).

| Code                   | Structure | Code                   | Structure |
|------------------------|-----------|------------------------|-----------|
| BLT 00154<br>50 ± 12   |           | KM 04550<br>22 ± 5     |           |
| BTB 01437<br>47 ± 16   |           | KM 04984<br>91 ± 35    |           |
| BTB 02328<br>16 ± 28   |           | KM 07661<br>31 ± 20    |           |
| BTB 02998<br>32 ± 15   |           | MBE 00142<br>148 ± 104 |           |
| BTB 03346<br>0.7 ± 0.1 |           | MBE 00145<br>126 ± 25  |           |

| Code                   | Structure | Code                   | Structure |
|------------------------|-----------|------------------------|-----------|
| BTB 03449<br>67 ± 17   |           | MBE 00148<br>2.7 ± 0.5 |           |
| BTB 05211<br>27 ± 6    |           | MBE 00151<br>14 ± 5    |           |
| BTB 05232<br>41 ± 16   |           | MBE 00152<br>42 ± 18   |           |
| BTB 06478<br>52 ± 23   |           | ML 00213 42 ± 10       |           |
| BTB 07350<br>33 ± 9    |           | MWP 00649<br>42 ± 12   |           |
| BTB 07496<br>8.4 ± 1.3 |           | MWP 01127<br>16 ± 2    |           |

| Code                   | Structure | Code                   | Structure |
|------------------------|-----------|------------------------|-----------|
| BTB 08066<br>8.2 ± 3.7 |           | MWP 01128<br>14 ± 8    |           |
| BTB 10392<br>2.1 ± 0.8 |           | NH 00306<br>64 ± 4     |           |
| BTB 11015<br>200 ± 229 |           | RDR 01439<br>0.9 ± 0.2 |           |
| BTB 11079<br>104 ± 64  |           | RH 00643<br>>100       |           |
| BTB 11331<br>>100      |           | RH 00644<br>7.8 ± 2.7  |           |
| BTB 11334<br>124 ± 117 |           | RH 00783<br>2.2 ± 0.4  |           |

| Code                   | Structure                                                                           | Code                   | Structure                                                                             |
|------------------------|-------------------------------------------------------------------------------------|------------------------|---------------------------------------------------------------------------------------|
| BTB 12892<br>>100      | 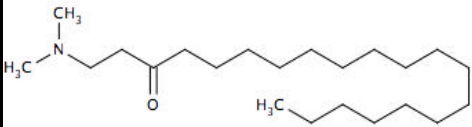   | RH 01061<br>2.4 ± 0.9  |    |
| BTB 13089<br>1.3 ± 0.2 |    | RH 01716<br>34 ± 21    |    |
| BTB 13368<br>18 ± 7    |    | RH 02106<br>28 ± 16    |    |
| BTB 13370<br>14 ± 6    |    | RJC 00100<br>28 ± 12   |    |
| BTB 13902<br>147 ± 174 |  | RJC 00357<br>4.8 ± 1.0 |  |
| BTB 14729<br>20 ± 4    |  | RJC 01351<br>54 ± 35   |  |

| Code                  | Structure                                                                           | Code                   | Structure                                                                             |
|-----------------------|-------------------------------------------------------------------------------------|------------------------|---------------------------------------------------------------------------------------|
| BTB 14731<br>61 ± 15  | 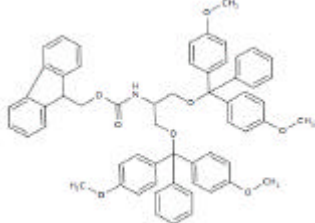   | RJC 01843<br>24 ± 3    |    |
| BTB 14755<br>28 ± 13  |    | RJC 02132<br>46 ± 14   |    |
| BTB13814<br>45 ± 146  |    | RJC 02270<br>73 ± 60   |    |
| CD 00240<br>12 ± 3    |    | RJC 02479<br>4.0 ± 0.9 |   |
| CD 00466<br>8.9 ± 7.3 |  | RJF 00257<br>>100      |  |
| CD 00469<br>4.2 ± 6.3 |  | RJF 01158<br>15 ± 9    |  |

| Code                  | Structure                                                                           | Code                | Structure                                                                             |
|-----------------------|-------------------------------------------------------------------------------------|---------------------|---------------------------------------------------------------------------------------|
| CD 00502<br>17 ± 10   | 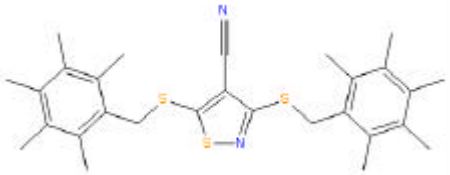   | RJF 01159<br>20 ± 4 |    |
| CD 01259<br>52 ± 9    |    | S 05133 21<br>± 8   |    |
| CD 02284<br>>100      |    | S 13592 15<br>± 2   |    |
| CD 03798<br>12 ± 2    |    | S 15348 123<br>± 28 |    |
| CD 11038<br>3.6 ± 1.0 |   | SEW 00556<br>22 ± 7 |   |
| HTS 01243<br>32 ± 22  |  | SEW 02957<br>19 ± 5 |  |



| Code                   | Structure | Code                   | Structure |
|------------------------|-----------|------------------------|-----------|
| HTS 02324<br>4.2 ± 0.6 |           | SEW 04707<br>2.1 ± 0.7 |           |
| HTS 04241<br>6.4 ± 2.8 |           | SEW 04852<br>81 ± 24   |           |
| HTS 04578<br>10 ± 3    |           | SEW 05565<br>22 ± 11   |           |
| HTS 06789<br>9.8 ± 4.2 |           | SEW 06186<br>94 ± 27   |           |
| HTS 06793<br>3.9 ± 0.8 |           | SP 00526<br>8.9 ± 7.7  |           |
| HTS 07133<br>8.3 ± 5.2 |           | SP 00531 66<br>± 26    |           |

| Code                   | Structure                                                                           | Code                  | Structure                                                                             |
|------------------------|-------------------------------------------------------------------------------------|-----------------------|---------------------------------------------------------------------------------------|
| HTS 07424<br>47 ± 29   | 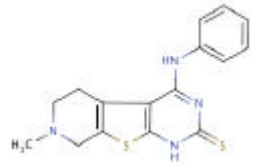   | SP 00752<br>136 ± 162 |    |
| HTS 07780<br>31 ± 30   |    | SP 00756 24<br>± 2    |    |
| HTS 09832<br>16 ± 3    |    | SP 00859 29<br>± 7    |    |
| JFD 00243<br>7.7 ± 0.8 |    | SP 00867 47<br>± 8    |    |
| JFD 02816<br>21 ± 4    |   | SP 00991 52<br>± 17   |   |
| JFD 02972<br>86 ± 16   |  | SP 01065<br>8.2 ± 3.3 |  |

| Code                  | Structure                                                                           | Code                  | Structure                                                                             |
|-----------------------|-------------------------------------------------------------------------------------|-----------------------|---------------------------------------------------------------------------------------|
| JFD 03132<br>>100     | 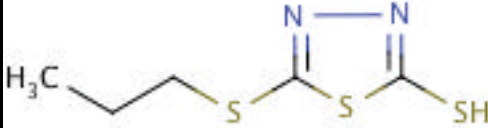   | SPB 00915<br>14 ± 3   |    |
| JFD 03146<br>>100     |    | SPB 00968<br>19 ± 4   |    |
| JFD 03571<br>15 ± 3   |    | SPB 01940<br>102 ± 62 |    |
| JP 00639<br>7.5 ± 5.3 |    | SPB 02638<br>127 ± 42 |    |
| KM 03455<br>25 ± 21   |   | SPB 04204<br>44 ± 15  |   |
| KM 04397<br>16 ± 2    |  | SPB 07453<br>51 ± 7   |  |

| Code                | Structure                                                                                                                | Code                   | Structure                                                                                                                                                        |
|---------------------|--------------------------------------------------------------------------------------------------------------------------|------------------------|------------------------------------------------------------------------------------------------------------------------------------------------------------------|
| KM 04549<br>56 ± 23 | 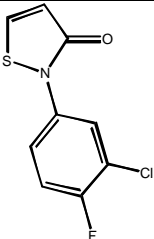 <chem>O=C1CN(S1)c2ccc(Cl)c(F)c2</chem> | XAX 00155<br>9.9 ± 2.9 |  <chem>O=C1CN(Cc2ccccc2)C(=S1)/C=C/c3ccc(cc3[N+](=O)[O-])Sc4ccc(Br)cc4</chem> |

Fig S1A - IC<sub>50</sub> - page 1/2

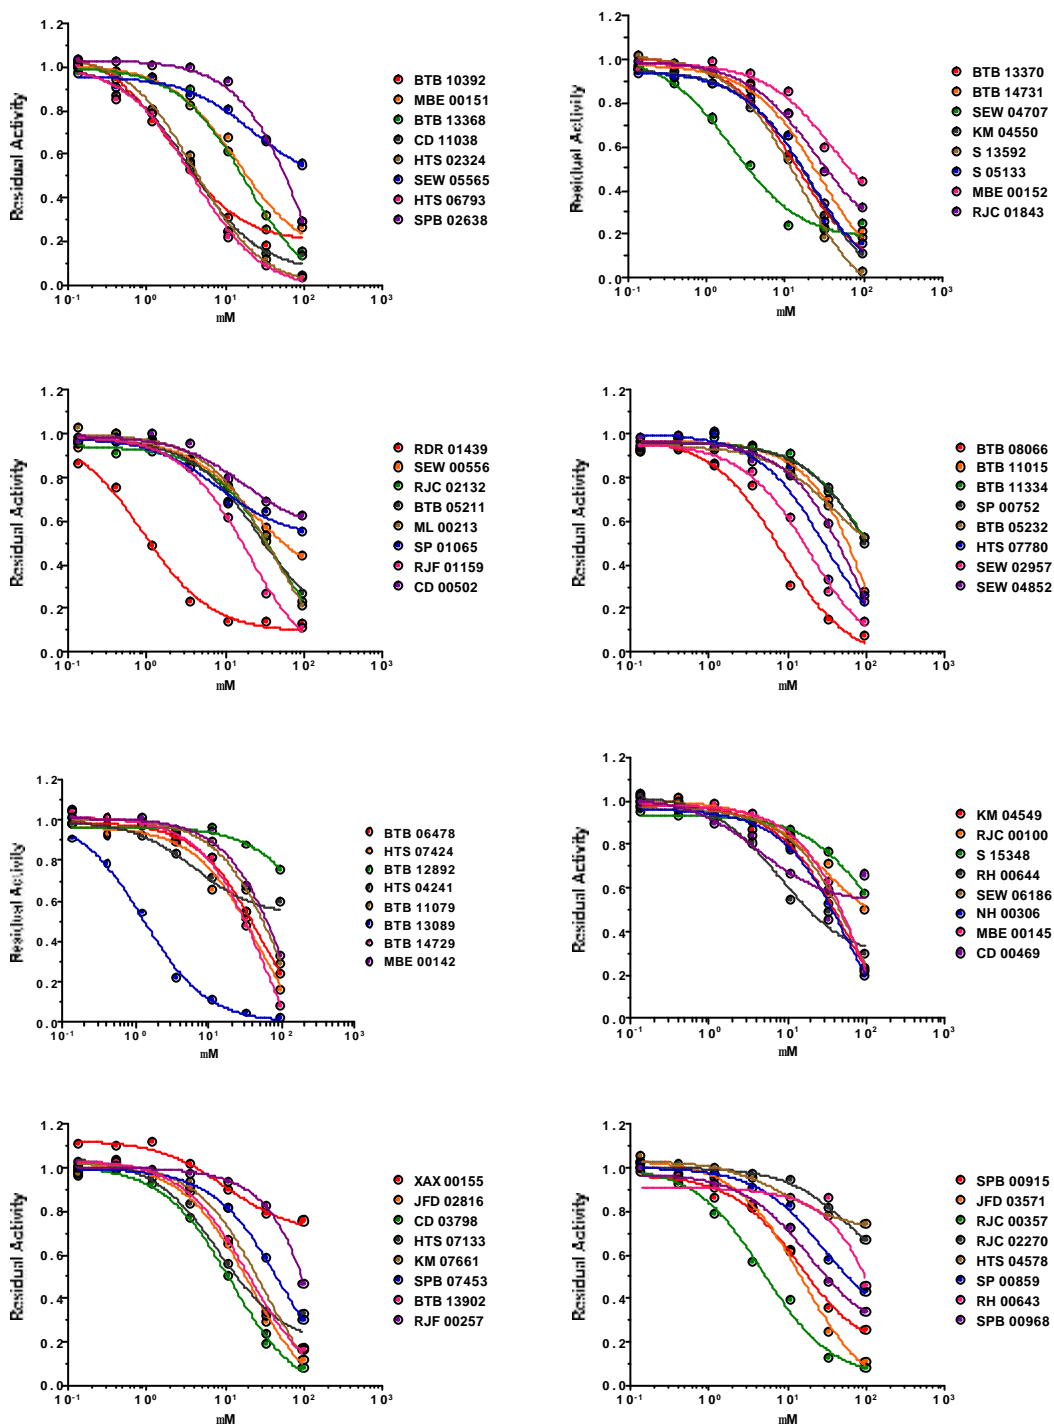

**Figure S1.** All 108 hits from the primary screen were evaluated for 3 characteristics using 4 assays: A) inhibition assay, to confirm and determine the IC<sub>50</sub> value in the presence of 0.8 mM MUGlc; B) heat denaturation attenuation assay, i.e. remaining Gcc activity in the pre-sence of the compound following heating to 50<sup>o</sup>C for 20 min.; changes in intracellular levels C) Gcc and D) Hex activity in GD patient fibroblasts (N370S/N370S) after cells were treated for five days with the indicated concentration of test compound.

Fig S1A - IC<sub>50</sub> - page 2/2

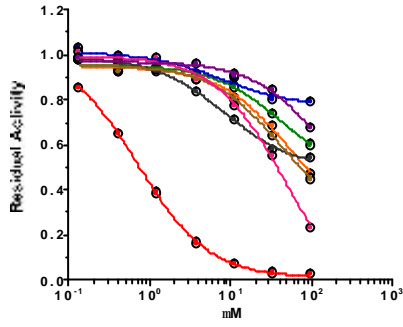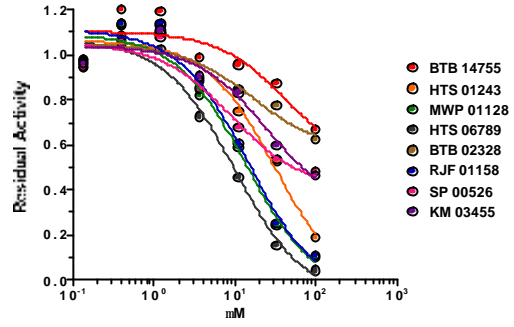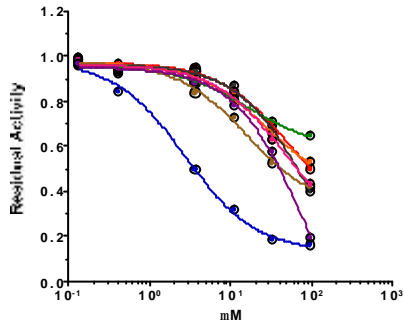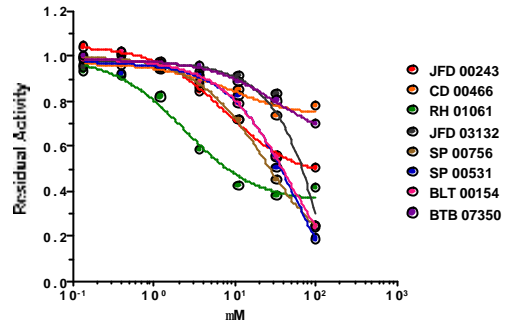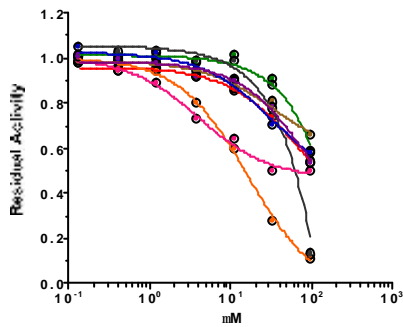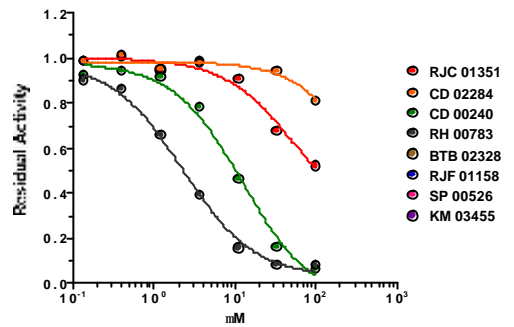

Fig S1B -Attenuation Heat Denaturation- page 1/2

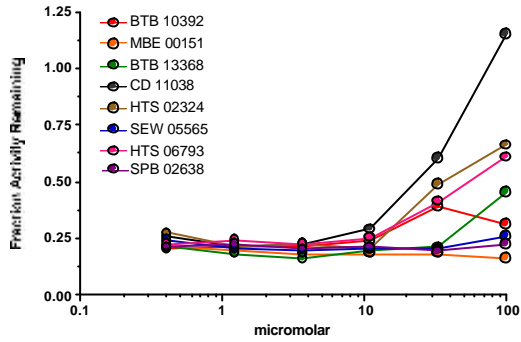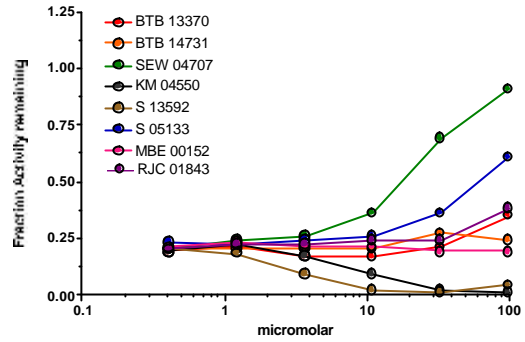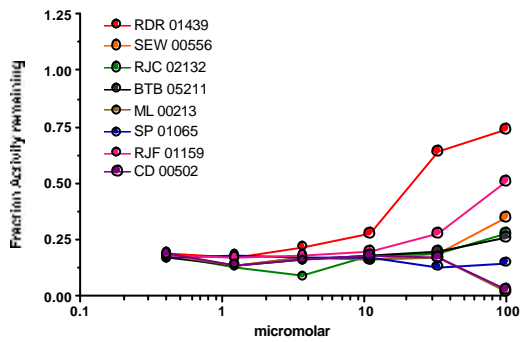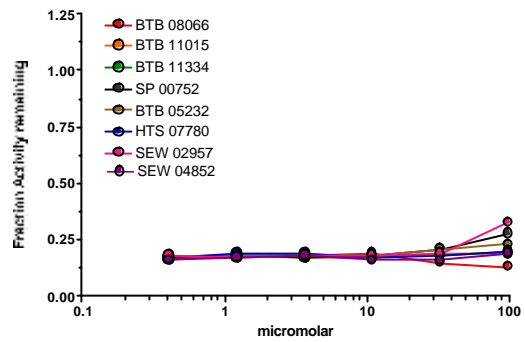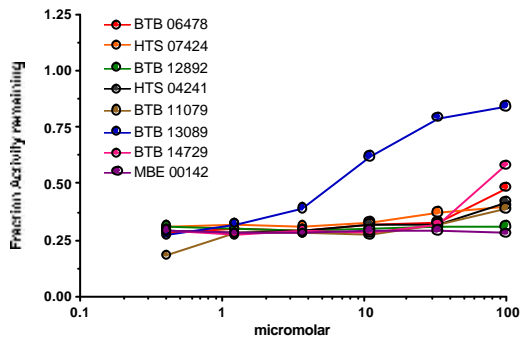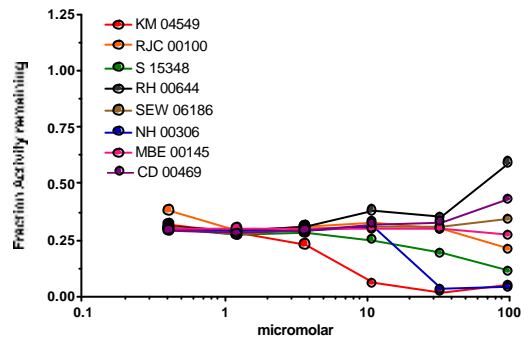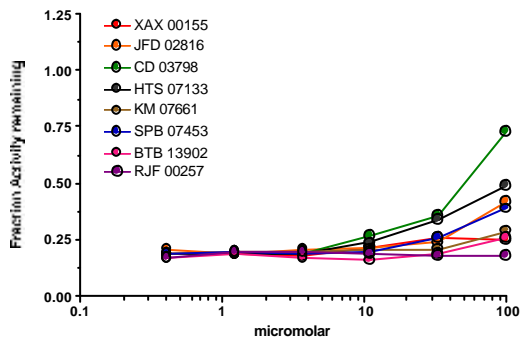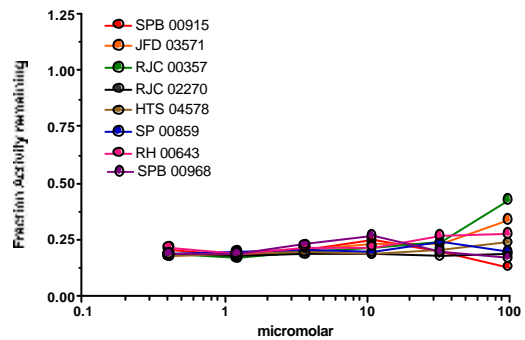

Fig S1B -Attenuation Heat Denaturation- page 2/2

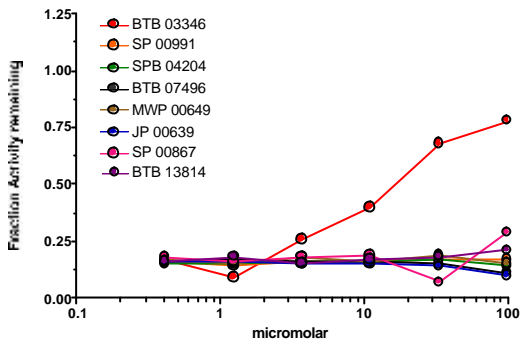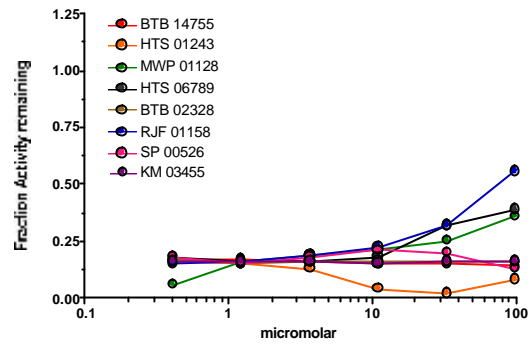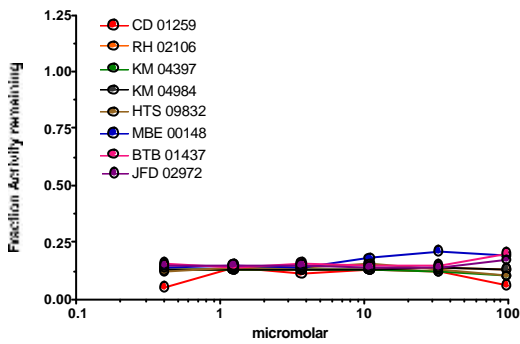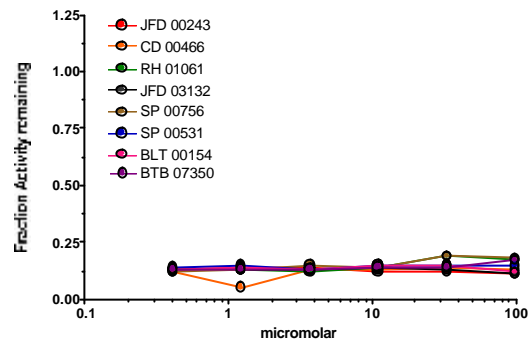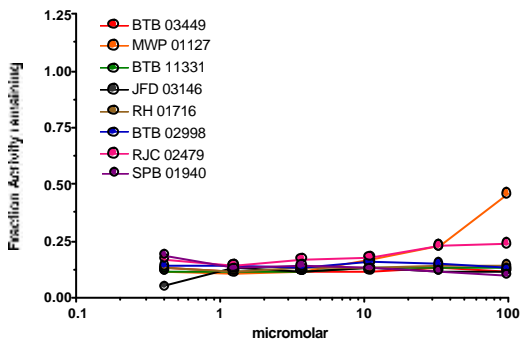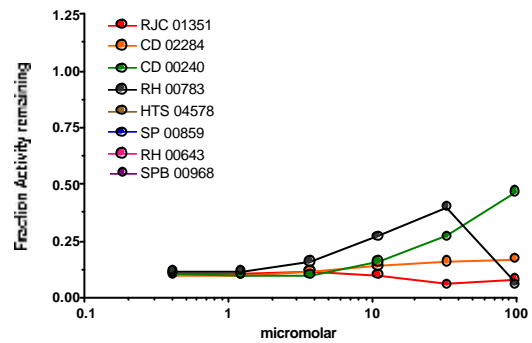



Fig S1C -Gcc levels N370S- page 1/2

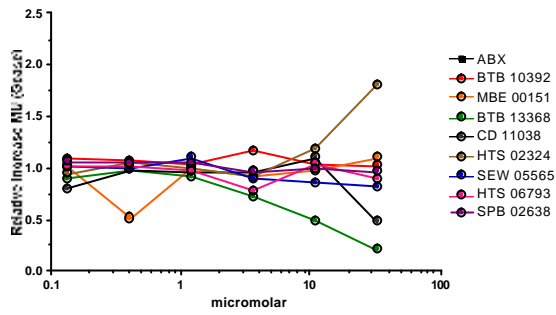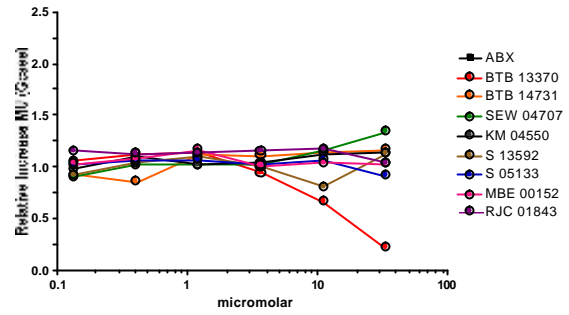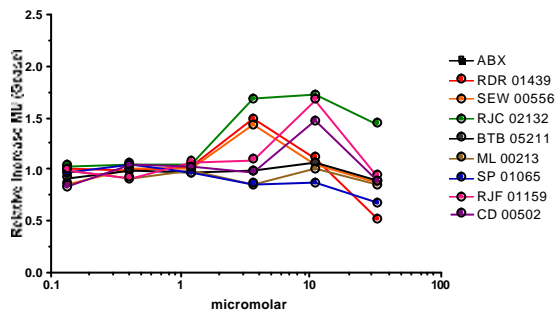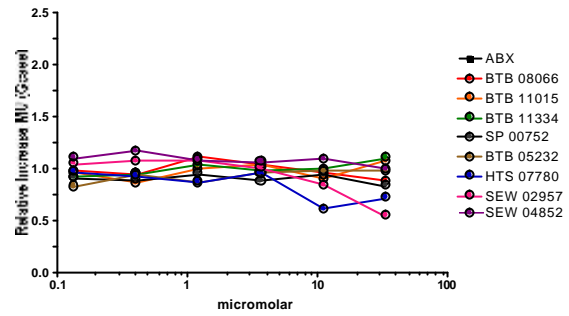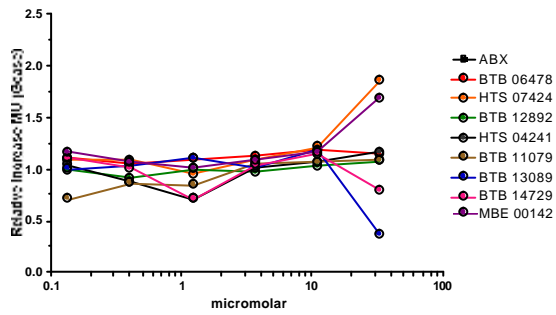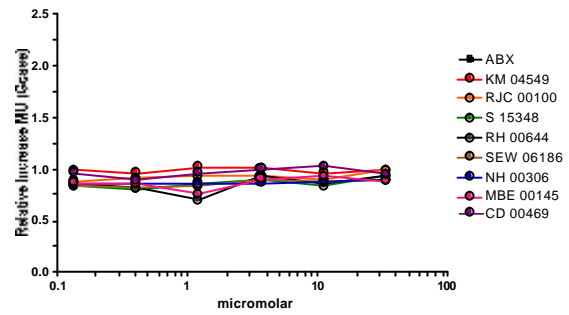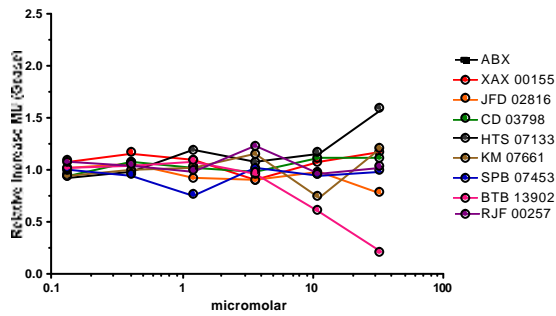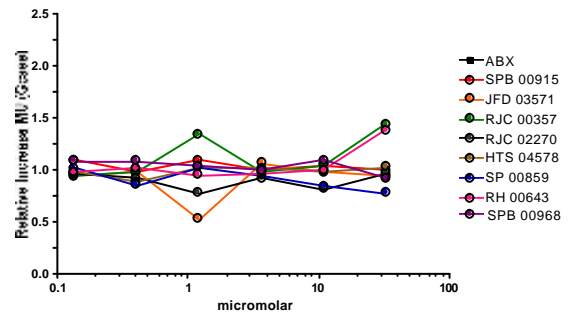

# Fig S1C -Gcc levels N370S- page 2/2

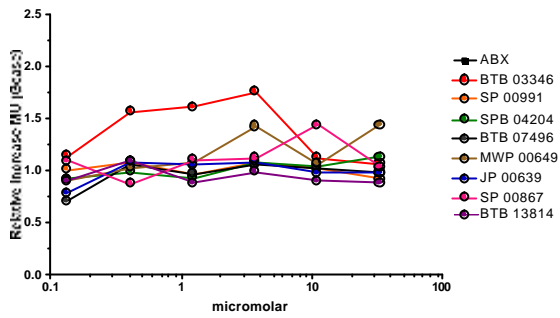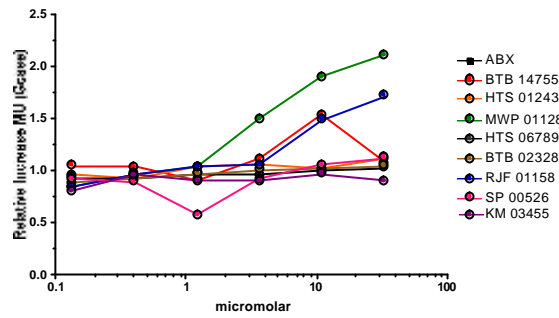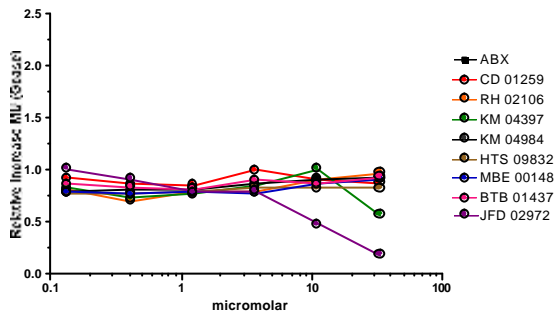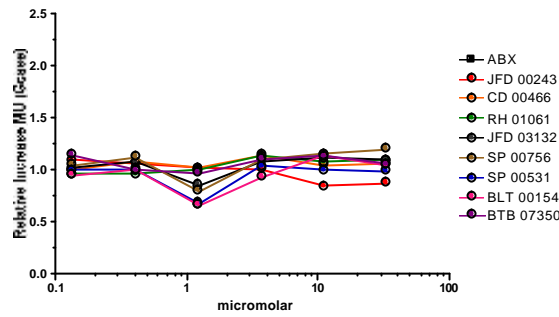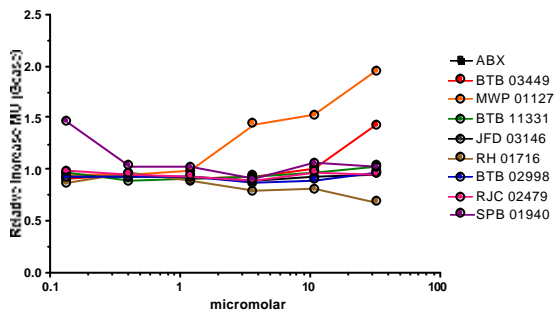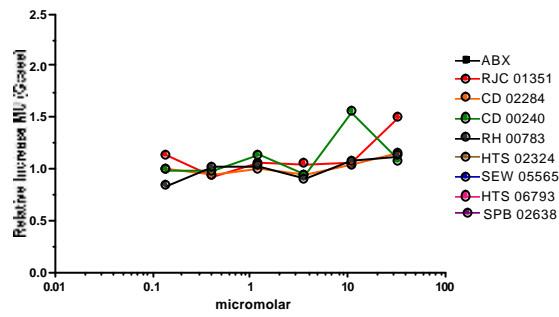

Fig S1D -Hex levels N370S- page 1/2

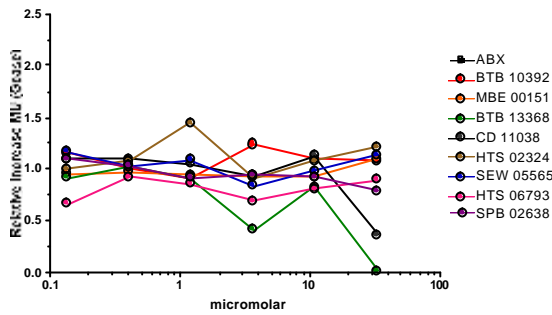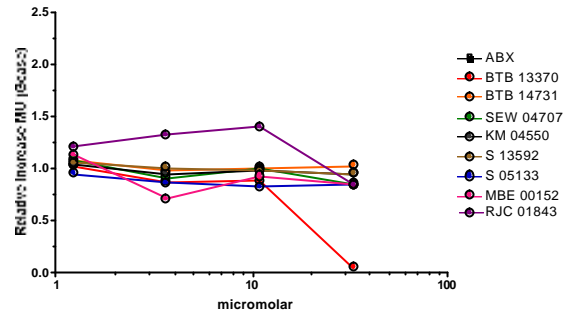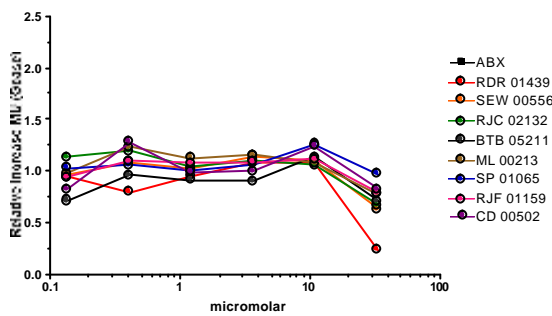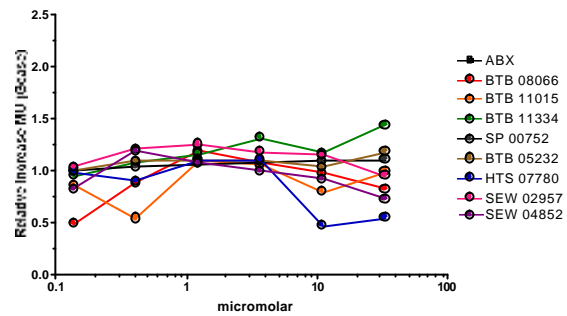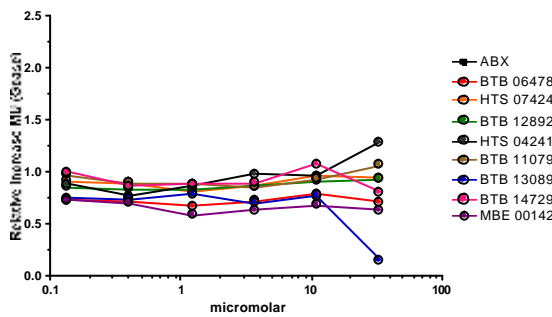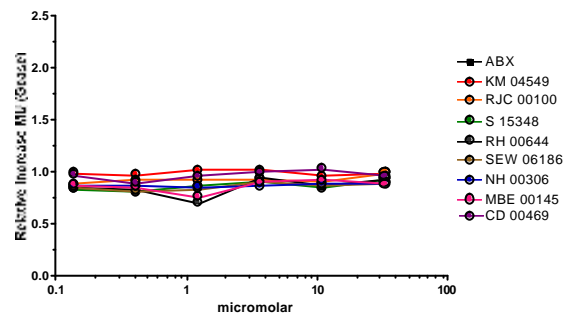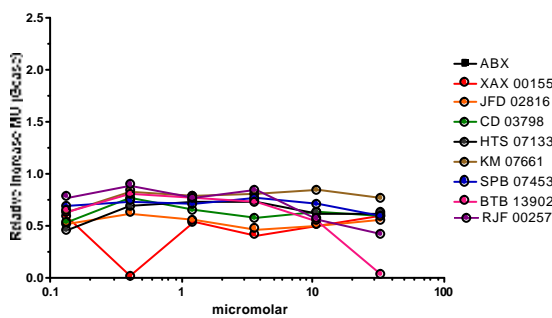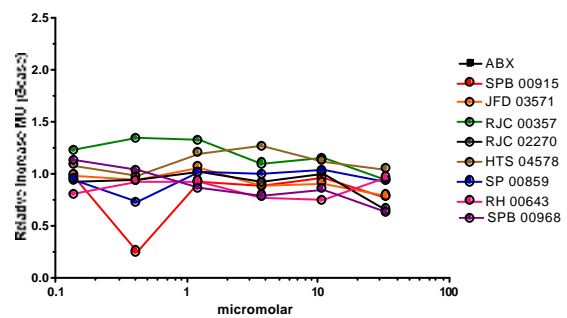

# Fig 1S -Hex levels N370S- page 2/2

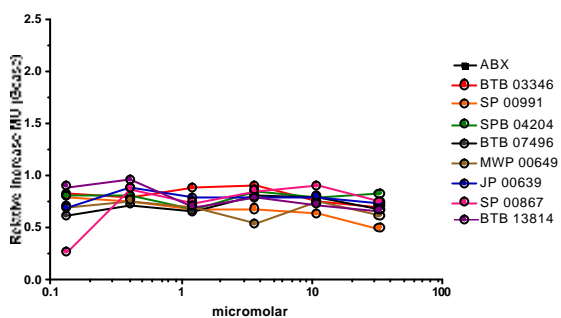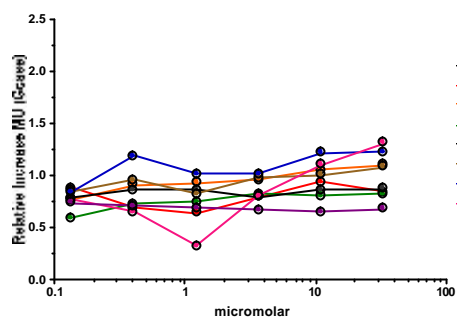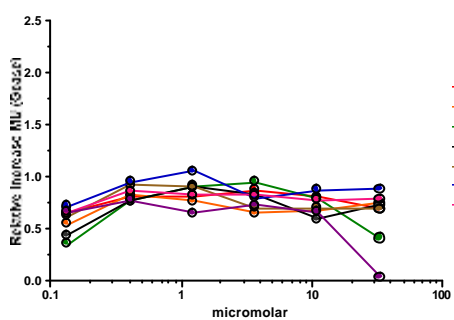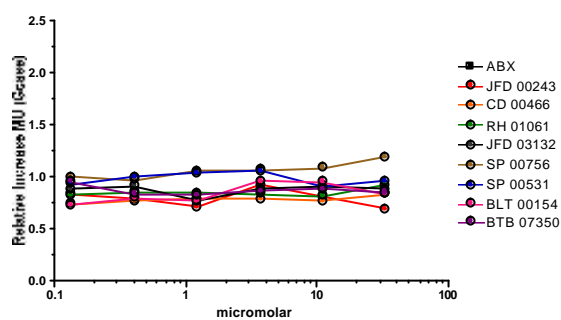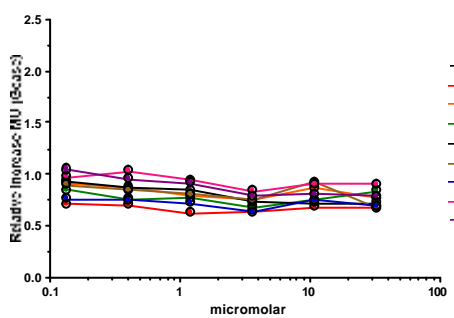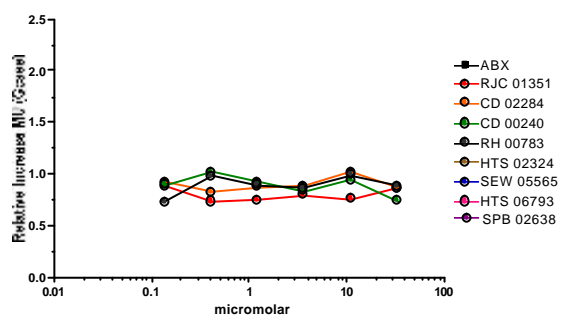

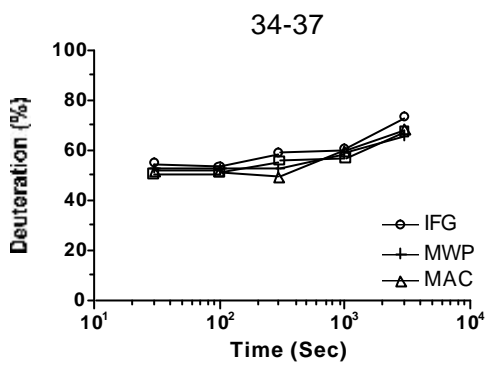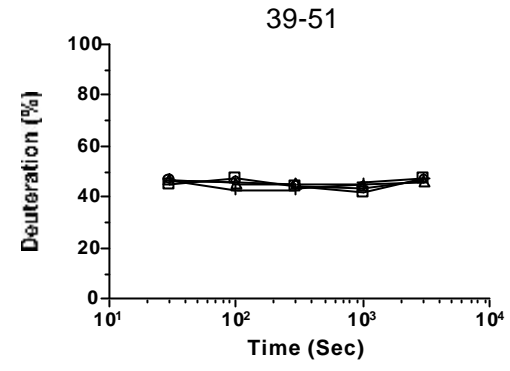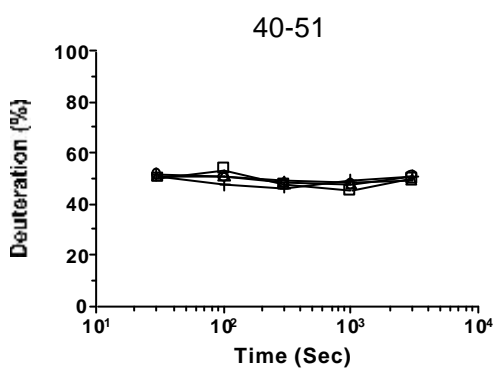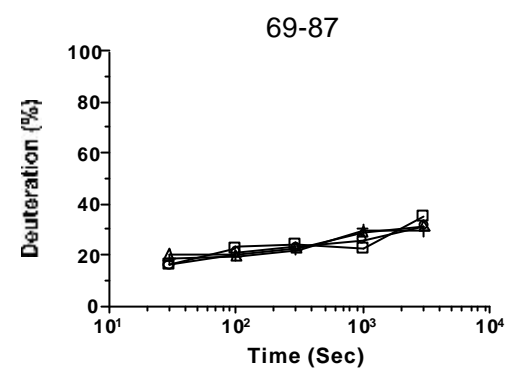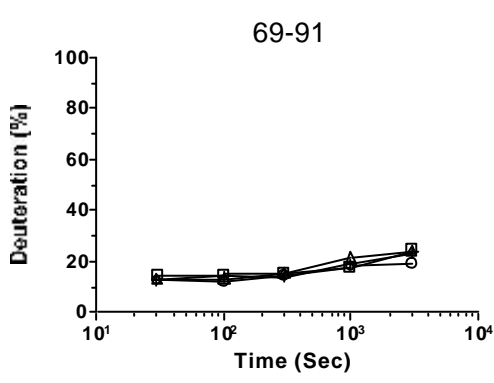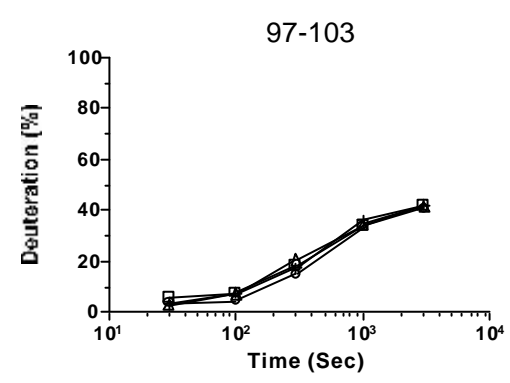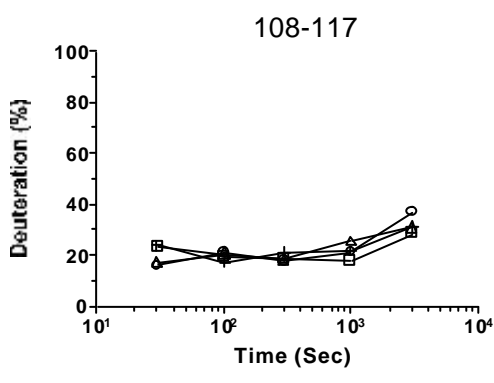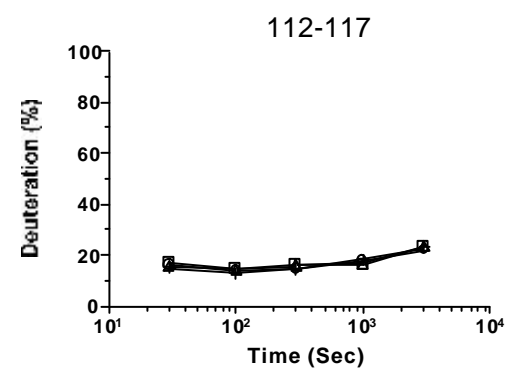

**Figure S2.** Deuterium build up curves are shown for all segments of Gcc in the absence of ligand (+), or in the presence of excess IFG ( $\Delta$ ), MWP (?) or MAC (o).

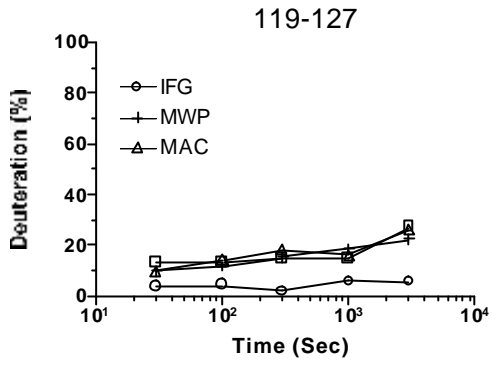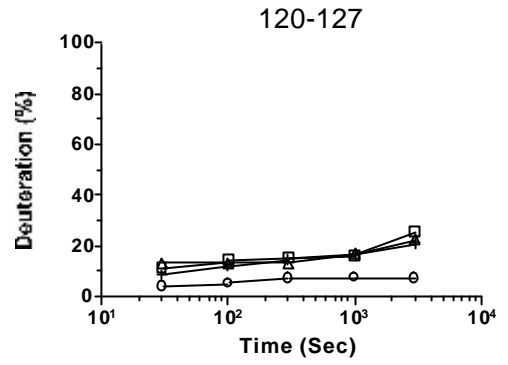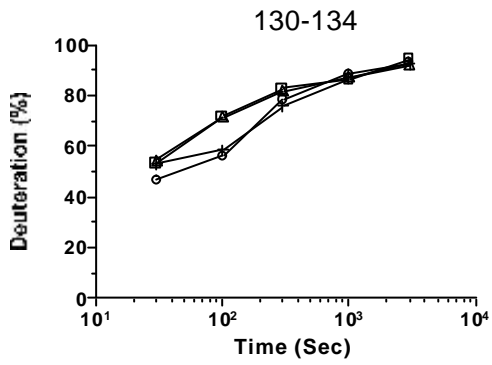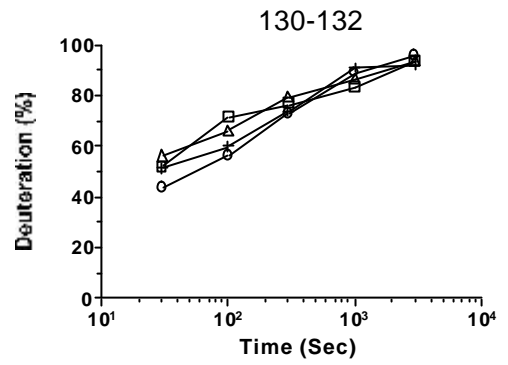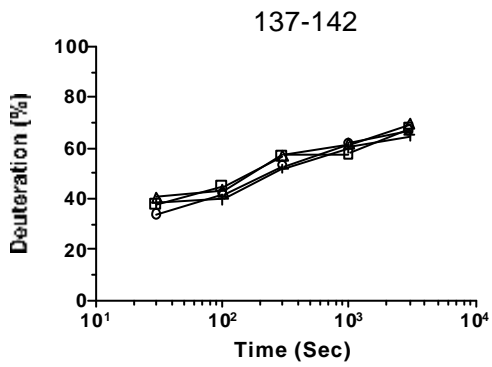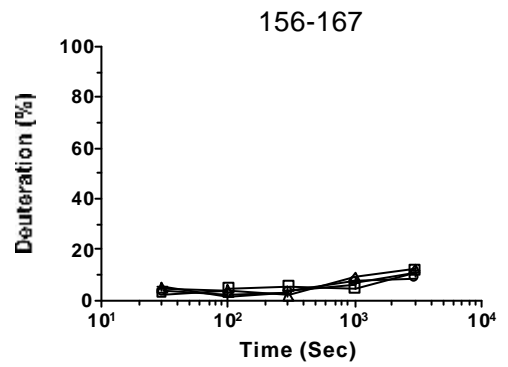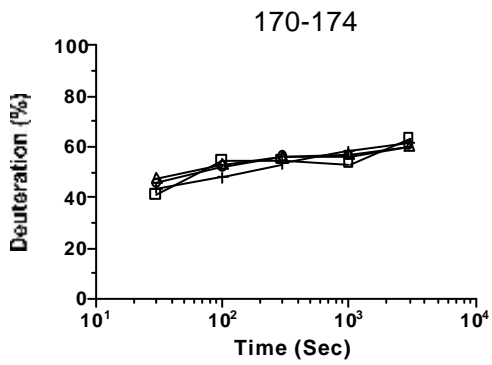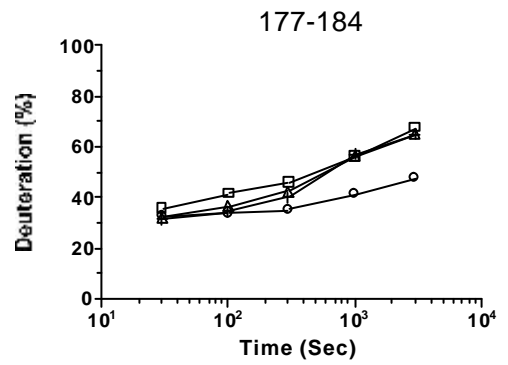

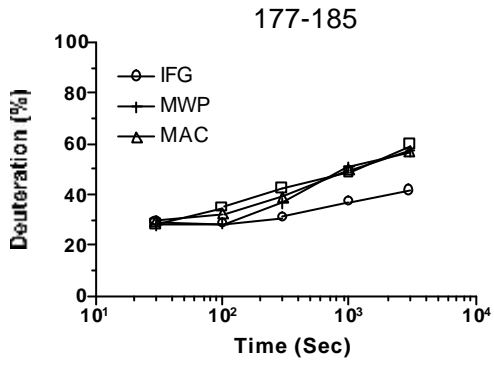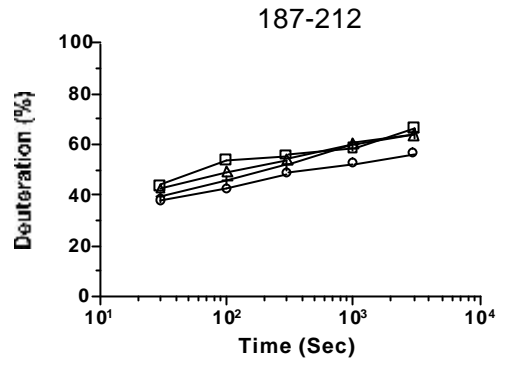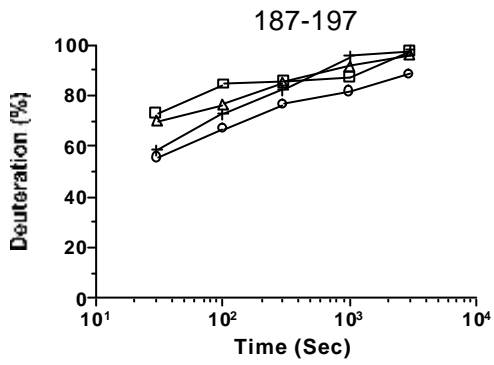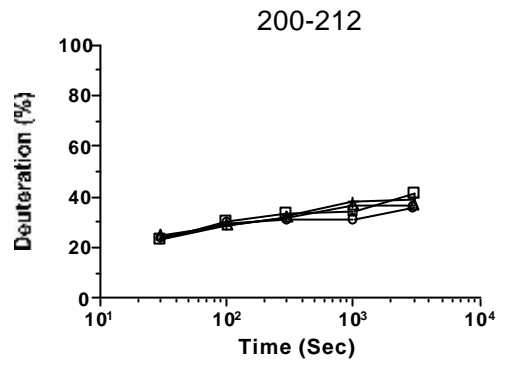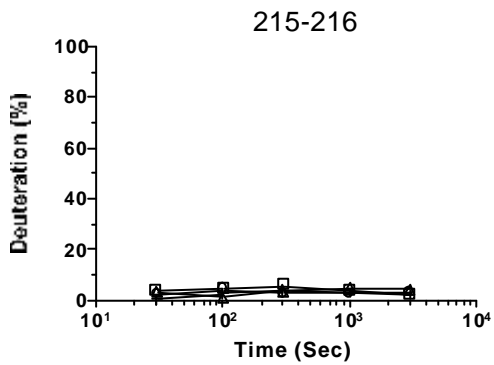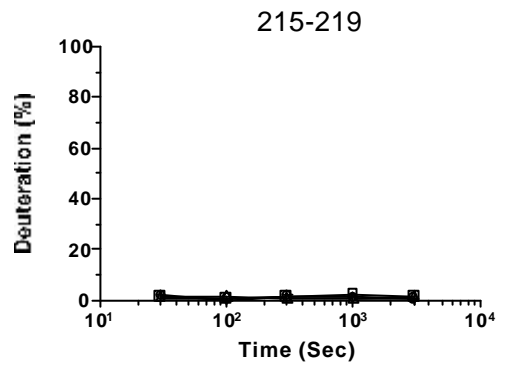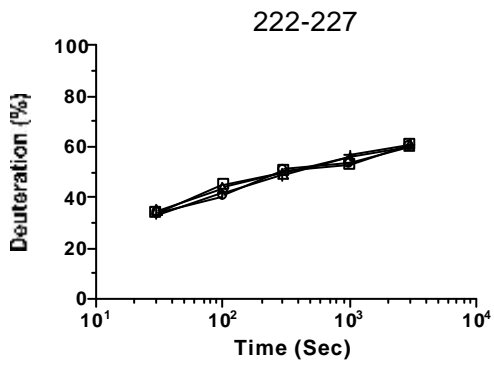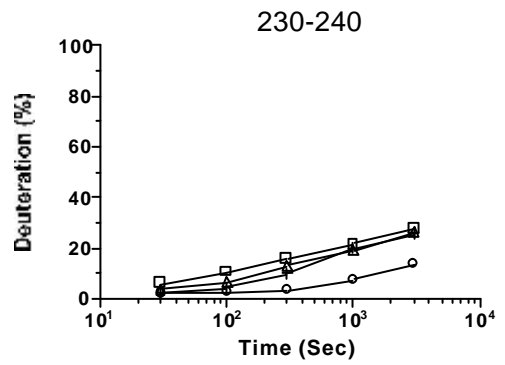

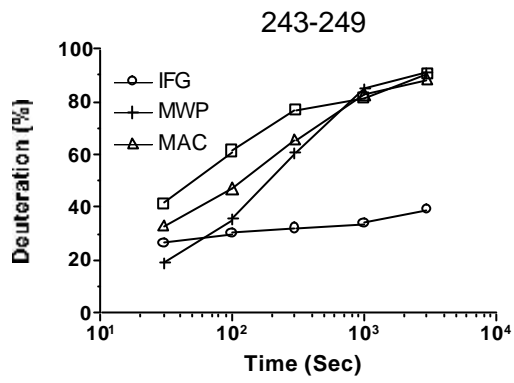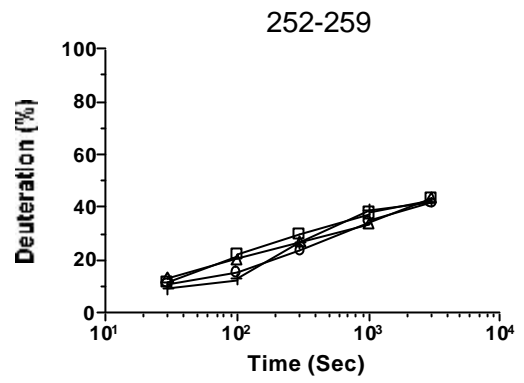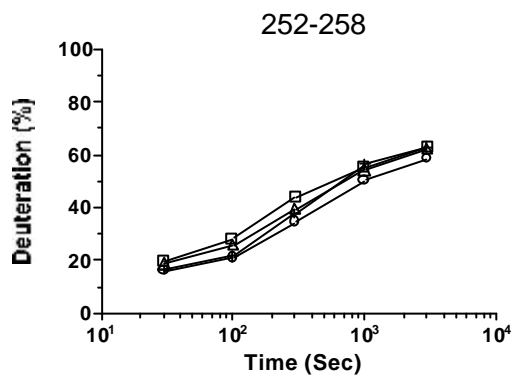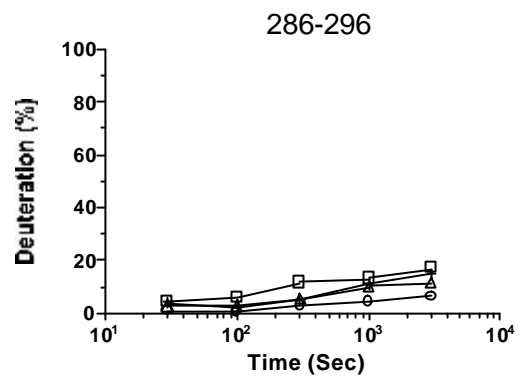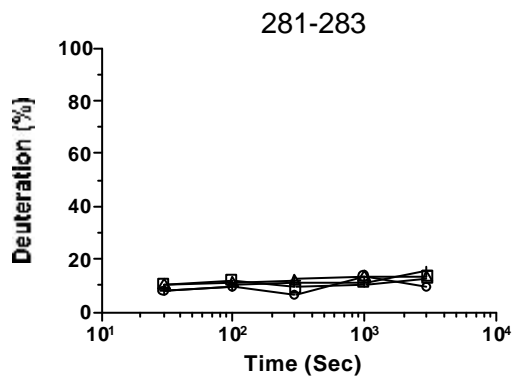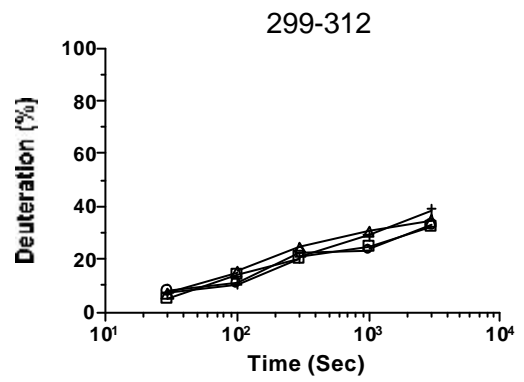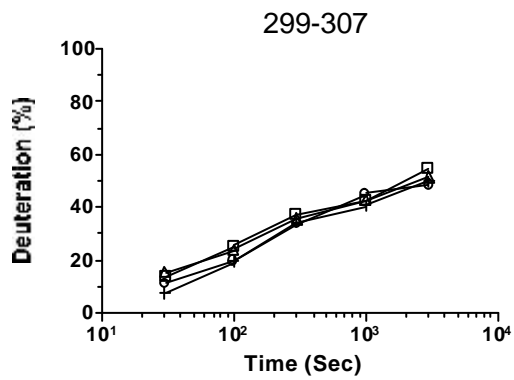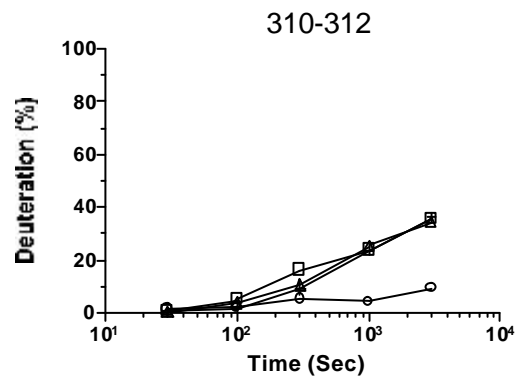



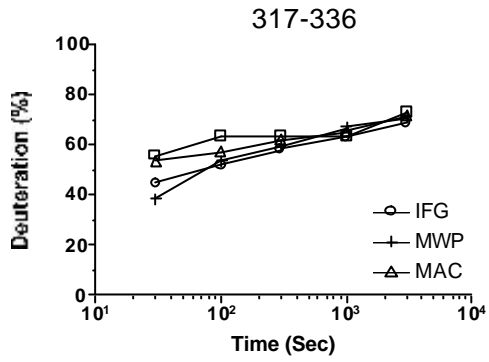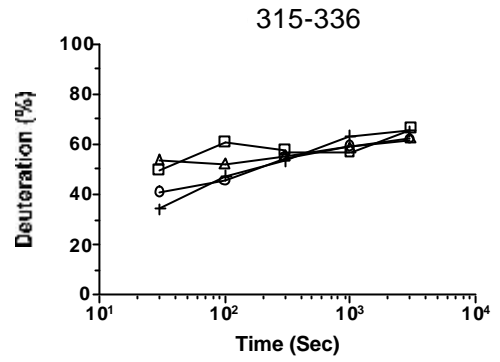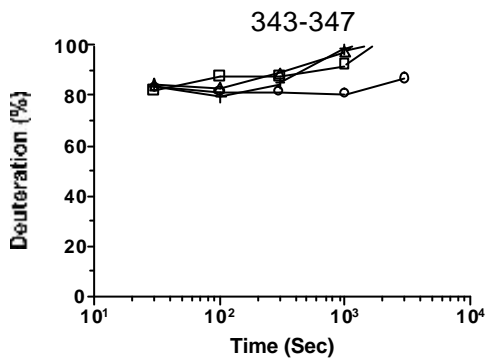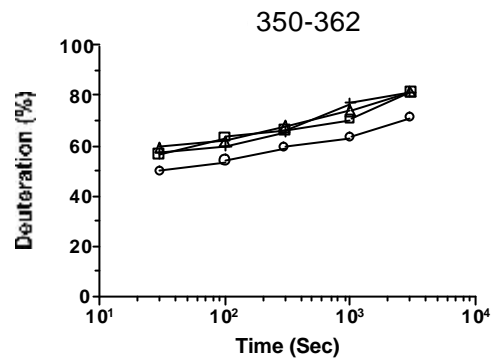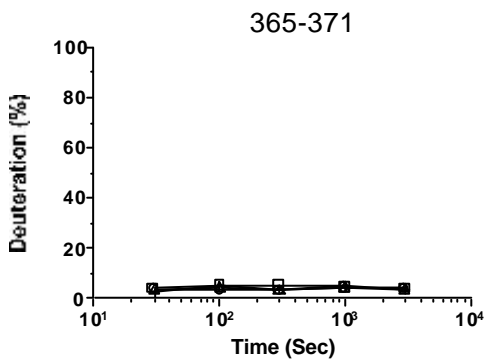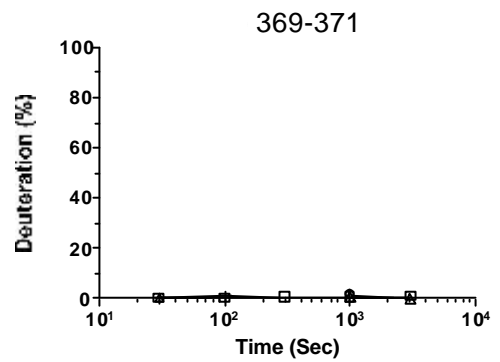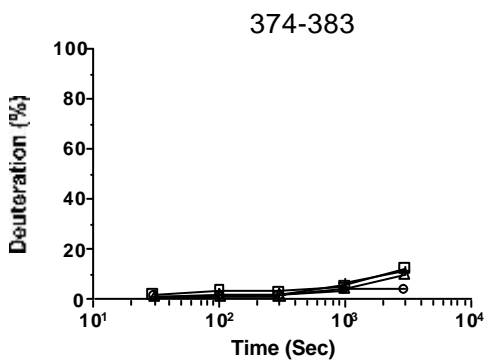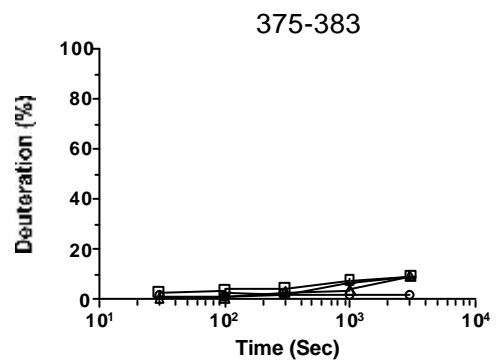

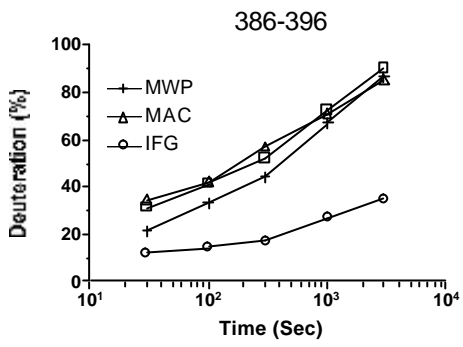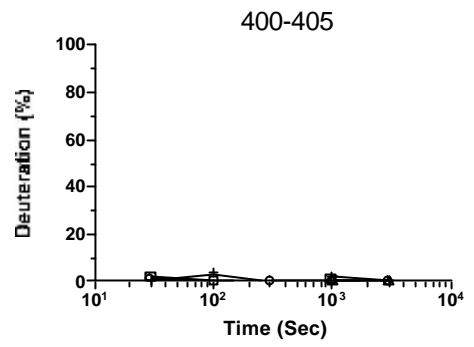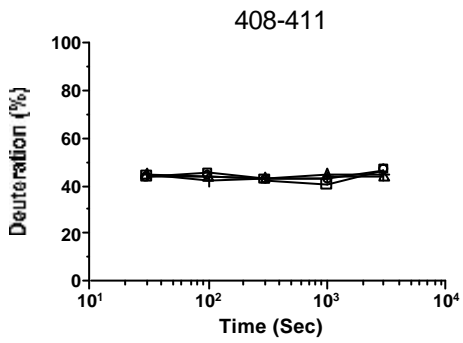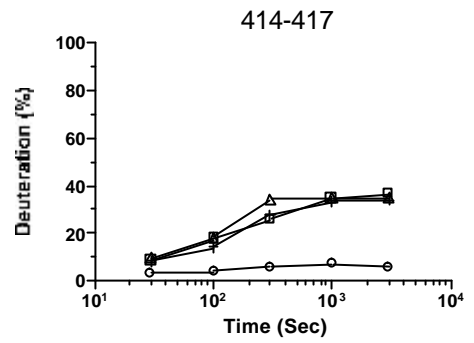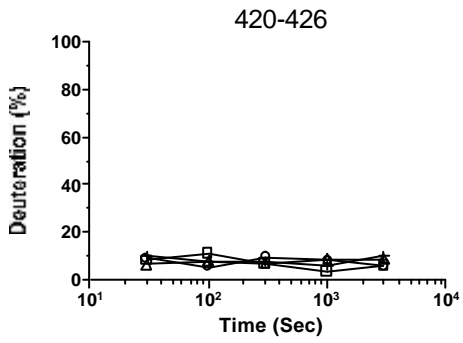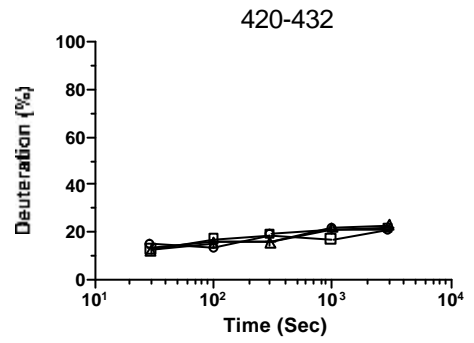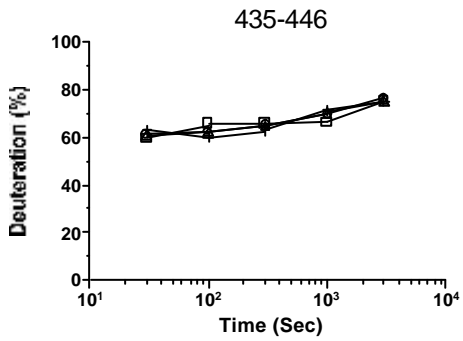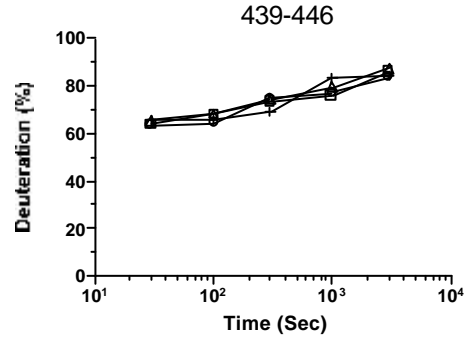

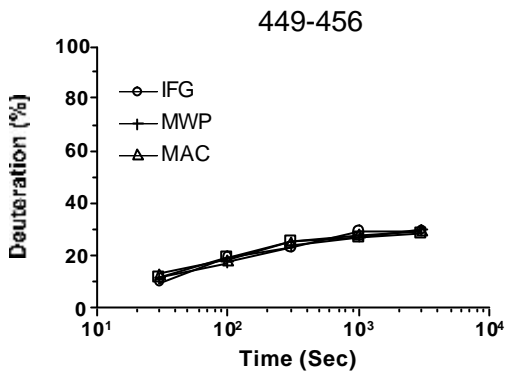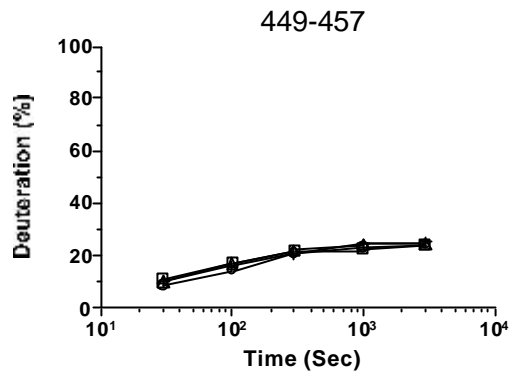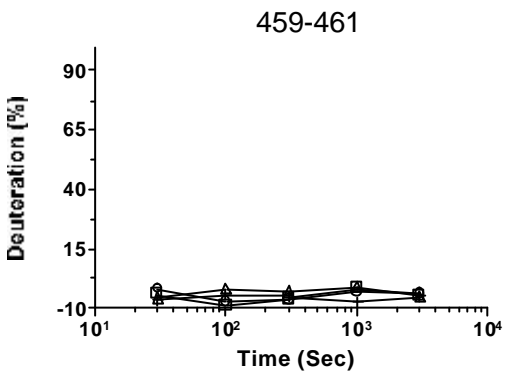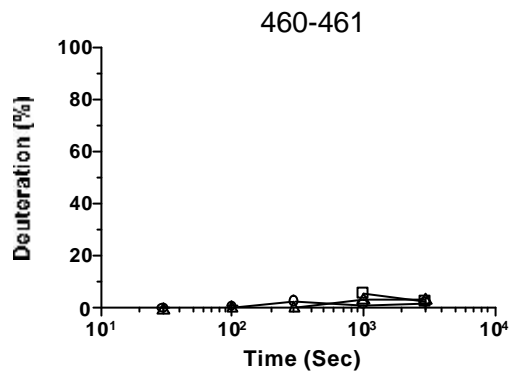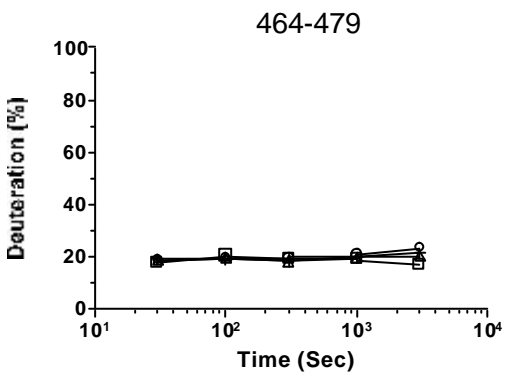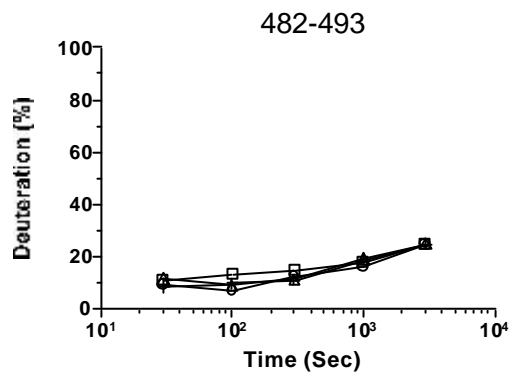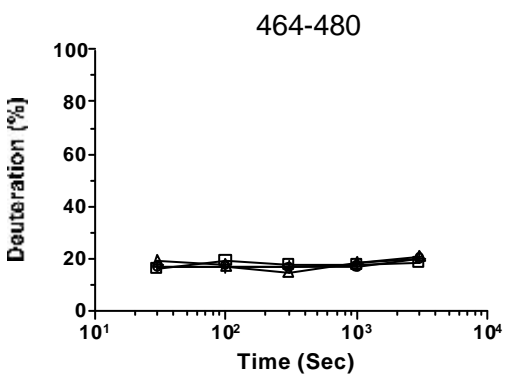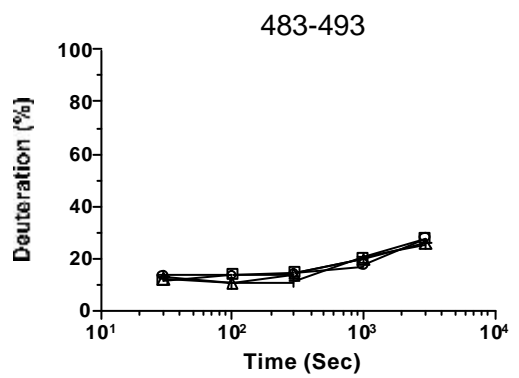

Supplement: NIHMS1362-supplement-Supplement.pdf [file NIHMS1362-supplement-Supplement.pdf]
